# Supplementary material for: Metabolic reprogramming during neuronal differentiation from aerobic glycolysis to neuronal oxidative phosphorylation
Source: eLife journal article supplement (doi:10.7554/elife.13374), 2016-06-10
Supplement: supp [file elife-13374-supp-v1.zip]

Archive with 21 entries (21 files):
- elife_poa_e13374_Figure_4_source_data_1.xlsx
- elife_poa_e13374_Figure_1_figure_supplement_1.pdf
- elife_poa_e13374_Figure_3_figure_supplement_1.pdf
- elife_poa_e13374_Figure_1_figure_supplement_6.pdf
- elife_poa_e13374_Figure_1_figure_supplement_2.pdf
- elife_poa_e13374_Figure_3_figure_supplement_2_source_data_1.xlsx
- elife_poa_e13374_Figure_1_figure_supplement_7.pdf
- elife_poa_e13374_Figure_1_source_data_1.xlsx
- elife_poa_e13374_Figure_1_figure_supplement_3.pdf
- elife_poa_e13374_Figure_5_figure_supplement_1_source_data_1.xlsx
- elife_poa_e13374_Figure_1_figure_supplement_6_source_data_1.xlsx
- elife_poa_e13374_Figure_1_figure_supplement_5.pdf
- elife_poa_e13374_Figure_1_figure_supplement_5_source_data_1.xlsx
- elife_poa_e13374_Figure_3_figure_supplement_1_source_data_1.xlsx
- elife_poa_e13374_Figure_2_source_data_1.xlsx
- elife_poa_e13374_Figure_5_source_data_1.xlsx
- elife_poa_e13374_Figure_3_source_data_1.xlsx
- elife_poa_e13374_Figure_3_figure_supplement_2.pdf
- elife_poa_e13374_Figure_1_figure_supplement_4.pdf
- elife_poa_e13374_Figure_5_figure_supplement_1.pdf
- elife_poa_e13374_Figure_1_figure_supplement_7_source_data_1.xlsx
