# Supplementary material for: Metabolic reprogramming during neuronal differentiation from aerobic glycolysis to neuronal oxidative phosphorylation
Source: eLife journal article supplement (doi:10.7554/elife.13374), 2016-06-10
Supplement: supp [file elife-13374-supp-v1.zip › elife_poa_e13374_Figure_1_figure_supplement_4.pdf]

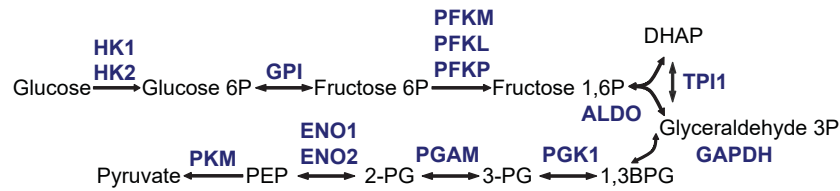

| Hexokinase |       |        |
|------------|-------|--------|
| Gene       | NPC   | Neuron |
| HK1        | 35.91 | 43.74  |
| HK2        | 14.75 | 1.05   |
| HK3        | 0.01  | 0.049  |
| Gck        | 0.273 | 0.325  |

| Aldolase |        |        |
|----------|--------|--------|
| Gene     | NPC    | Neuron |
| ALDOA    | 328.91 | 105.10 |
| ALDOB    | 0.022  | 0.063  |
| ALDOC    | 11.804 | 3.1    |

| Phosphoglycerate mutase |        |        |
|-------------------------|--------|--------|
| Gene                    | NPC    | Neuron |
| PGAM1                   | 36.68  | 15.48  |
| PGAM2                   | 2.494  | 7.4765 |
| PGAM5                   | 14.271 | 9.5225 |

| Glucose Phosphate Isomerase |       |        |
|-----------------------------|-------|--------|
| Gene                        | NPC   | Neuron |
| GPI                         | 39.19 | 34.75  |

| Glyceraldehyde 3-Phosphate dehydrogenase |      |        |
|------------------------------------------|------|--------|
| Gene                                     | NPC  | Neuron |
| GAPDH                                    | 1889 | 580    |
| GAPDHS                                   | 1.89 | 1.16   |

| Enolase |       |        |
|---------|-------|--------|
| Gene    | NPC   | Neuron |
| Eno1    | 780.9 | 196.23 |
| Eno2    | 55.05 | 140.2  |
| Eno3    | 2.287 | 3.5135 |
| Eno4    | 0.347 | 1.486  |

| Phosphofructokinase |       |        |
|---------------------|-------|--------|
| Gene                | NPC   | Neuron |
| PFKL                | 60.16 | 36.83  |
| PFKM                | 50.40 | 71.34  |
| PFKP                | 26.09 | 13.78  |

| Phosphoglycerate kinase |        |        |
|-------------------------|--------|--------|
| Gene                    | NPC    | Neuron |
| PGK1                    | 167.5  | 62.9   |
| PGK2                    | 0.0195 | 0      |

| Pyruvate kinase |       |        |
|-----------------|-------|--------|
| Gene            | NPC   | Neuron |
| PKM             | 528.2 | 133.1  |
| PKLR            | 1.082 | 2.762  |

Figure 1, figure supplement 4
