# Supplementary material for: Metabolic reprogramming during neuronal differentiation from aerobic glycolysis to neuronal oxidative phosphorylation
Source: eLife journal article supplement (doi:10.7554/elife.13374), 2016-06-10
Supplement: supp [file elife-13374-supp-v1.zip › elife_poa_e13374_Figure_1_figure_supplement_5_source_data_1.xlsx]

## Sheet: Fig1S5
				NPC			neuron 3W
		3-phosphoglycerate-tbdms	6.43319	5.56712	4.91318	3.08355	3.21285	2.63185
		a-ketoglutarate-tbdms	8.05669	9.74732	12.8386	1.86864	1.72426	1.83363
		alanine-tbdms	85.2704	98.6218	101.917	22.5719	20.5107	26.4553
		aspartate	14.94	13.8829	11.8428	10.2929	10.6266	13.0174
		citrate-tbdms	9.90932	9.89923	12.0803	3.75934	3.11597	3.51356
		fumarate-tbdms	3.60136	2.9169	3.01816	0.729327	1.01355	1.15498
		Lactate-tbdms	348.468	449.636	482.679	29.5306	31.5043	27.3651
		malate-tbdms	21.5058	25.1318	23.5194	4.24313	5.14937	6.22819
		succinate-tbdms	1.95894	1.90998	2.05249	1.25819	1.53272	0.920476
		pyruvate	9.37478	12.0147	10.8126	3.27793	3.54863	3.69102
		%
		3-phosphoglycerate-tbdms	114.107	98.7458	87.1467	54.6939	56.9874	46.682
		a-ketoglutarate-tbdms	78.8774	95.4292	125.693	18.2945	16.881	17.9518
		alanine-tbdms	89.5041	103.518	106.977	23.6926	21.5291	27.7688
		aspartate	110.215	102.417	87.3671	75.9328	78.3947	96.0325
		citrate-tbdms	93.2238	93.1289	113.647	35.3667	29.3141	33.0544
		fumarate-tbdms	113.293	91.7609	94.9463	22.9434	31.8846	36.3338
		Lactate-tbdms	81.6222	114.238	122.634	7.50279	8.00424	6.95262
		malate-tbdms	91.9615	107.467	100.572	18.1441	22.0193	26.6325
		succinate-tbdms	99.2468	96.7665	103.987	63.7445	77.6531	46.6346
		pyruvate	87.337	111.931	100.732	30.5377	33.0597	34.3862
		Figure 1—figure supplement 5. Metabolites quantified by gas chromatography mass spectrometry (GC-MS). NPCs at early passage (P3) and 3-week neurons were incubated in fresh medium for 12 h, and metabolites in cells were extracted and analyzed by GC-MS. The relative amount of metabolites extracted from neurons versus NPCs was obtained after normalization to protein content. Bars represent mean ± SD…
