# Supplementary material for: Metabolic reprogramming during neuronal differentiation from aerobic glycolysis to neuronal oxidative phosphorylation
Source: eLife journal article supplement (doi:10.7554/elife.13374), 2016-06-10
Supplement: supp [file elife-13374-supp-v1.zip › elife_poa_e13374_Figure_1_figure_supplement_6_source_data_1.xlsx]

## Sheet: Fig1S6
	BJ NPC1		BJ NPC2		H9 NPC			BJ Neuron1		BJ Neuron2		H9 Neuron
	Value	StandardDeviation	Value	StandardDeviation	Value	StandardDeviation		Value	StandardDeviation	Value	StandardDeviation	Value	StandardDeviation
	140.486	3.30549	139.678	7.20371	137.075	8.80592		153.962	13.9137	161.814	9.36291	159.903	14.4383
	128.689	3.76408	128.653	7.88274	126.664	8.6684		144.722	11.4391	153.497	7.50835	155.536	14.3173
	124.912	3.97407	124.051	6.42878	123.805	6.74711		144.242	12.205	151.899	7.05611	155.358	13.7546
Basal OCR	123.718	4.09849	122.64	4.6243	123.83	6.36879		144.121	11.468	152.997	6.67193	156.181	13.8929
Max OCR	170.033	9.20919	171.378	8.44327	162.874	6.6262		224.135	4.92949	238.326	6.5202	235.527	9.60602
	166.214	8.90207	170.109	10.2889	159.999	5.70806		239.566	6.23068	255.427	6.74525	248.362	12.2392
	164.181	8.64805	168.156	9.77332	158.072	5.95871		242.586	9.75505	260.382	7.88296	251.797	13.4946
	161.3	8.32148	164.879	9.01834	154.963	6.06853		244.888	10.1787	263.269	8.3478	253.668	14.0939
	41.1229	8.16996	42.7765	8.18635	37.422	5.5355		51.3532	5.86869	56.9496	6.00863	69.2367	13.8755
nonmitochondria OCR	44.7584	8.41083	41.9046	3.1318	37.9514	6.32114		51.0734	5.03174	55.8236	6.68922	55.8809	17.3895
	45.4877	6.15476	43.6497	2.60721	40.6159	4.78923		52.6147	5.46328	57.0688	6.58894	58.8021	14.2059
	43.3123	6.48337	41.6612	1.26884	38.3544	6.15133		49.3108	8.44652	56.0754	6.56885	59.0036	11.6106
			BJ NPC2	BJ Neuron2
			98.6776	106.814
			87.6528	98.4966
			83.0506	96.8994
			81.6396	97.9974
			130.378	183.326
			129.109	200.427
			127.156	205.382
			123.879	208.269
			1.77652	1.94956
			0.904563	0.8236
			2.64974	2.06882
			0.661181	1.07544
	Figure 1—figure supplement 6. Oxygen consumption rate (OCR) analysis by Seahorse extracellular flux analysis. FCCP (F) is a chemical uncoupler of electron transport and oxidative phosphorylation; Rotenone and Antimycin A (R&A) are complex I and III inhibitors. Error bars represent SD. None mitochondrial OCR has been subtracted.
