# Supplementary material for: Metabolic reprogramming during neuronal differentiation from aerobic glycolysis to neuronal oxidative phosphorylation
Source: eLife journal article supplement (doi:10.7554/elife.13374), 2016-06-10
Supplement: supp [file elife-13374-supp-v1.zip › elife_poa_e13374_Figure_1_figure_supplement_7_source_data_1.xlsx]

## Sheet: Fig1S7
	lactate/glucose
	NPC	1.65424	1.57813	1.62763
	Neuron	0.330053	0.354077	0.369133
	Figure 1—figure supplement 7. The glucose and lactate concentrations in the medium growing NPCs and 3-week neurons were quantified by YSI 2950 metabolite analyzer. The lactate production/ glucose consumption ratio was calculated as the amount of lactate divided by used glucose. Bars represent mean ± SD. n=3. In theory, if one glucose molecule is completely converted into lactate (no entry into mi…
