# Supplementary material for: Metabolic reprogramming during neuronal differentiation from aerobic glycolysis to neuronal oxidative phosphorylation
Source: eLife journal article supplement (doi:10.7554/elife.13374), 2016-06-10
Supplement: supp [file elife-13374-supp-v1.zip › elife_poa_e13374_Figure_1_source_data_1.xlsx]

## Sheet: Fig1
Figure 1 G, H, I, J	FPKM
Glycolysis	NPC				neuron 1 week				neuron 3 week					Figure 1E	fold change	NPC				neuron 1 week				neuron 3 week
GLUT1	30.091	28.552	96.476	86.876	15.93	15.129	41.911	37.786	24.072	19.187	26.952	27.443			NEUROD2	1.02	1.02	0.93	0.98	35.5	37.75	6.97	9.09	68.63	37.97	51.39	52.7
GLUT3	65.173	62.663	32.715	30.533	9.333	9.505	9.927	9.18	7.52	7.049	13.421	13.434			MYT1L	1.1	1.05	0.99	0.97	6.56	6.3	2.04	1.65	11.22	10.86	8.34	8.33
HK1	35.545	35.626	36.735	35.085	43.098	44.778	39.369	35.003	46.615	40.87	59.406	59.05			MAPT	1.08	1.07	0.96	0.95	5.55	5.55	2.29	2.09	13.66	12.67	9.98	10.08
HK2	13.906	13.271	14.687	14.807	3.575	3.129	2.803	2.652	1.084	1.021	2.689	2.428			SYN1	1.04	1.07	0.89	0.92	4.53	4.51	1.79	1.99	8.47	7.25	7.95	7.97
GPI	30.108	29.336	41.633	36.754	26.694	27.898	20.237	18.813	35.955	33.554	40.766	40.22			CHD5	0.95	0.96	1.06	1.07	50.34	47.49	24.06	25.65	89.81	79.79	65.23	68.82
PFKP	13.935	14.525	27.459	24.739	21.523	20.869	15.684	14.991	15.869	11.696	19.51	19.531			GABBR2	1.02	1.08	0.92	0.94	27.41	27.62	4.76	4.01	33.16	31.64	26.8	25.82
PFKM	48.155	45	52.212	48.593	58.515	58.879	73.219	70.146	70.75	71.931	60.219	58.784
PFKL	47.518	49.064	64.018	56.299	39.267	40.58	43.87	41.885	44.119	29.539	35.649	36.561
PFKFB3	12.081	12.096	18.543	16.109	17.481	18.223	19.958	19.377	28.342	26.467	17.483	18.035		Figure 1F	fold change	NPC				neuron 1 week				neuron 3 week
ALDOA	253.986	254.906	351.108	306.72	193.567	205.81	103.629	94.311	117.361	92.846	230.786	239.622			LIN28A	1.02	1.07	0.96	0.95	0.07	0.05	0.05	0.06	0.05	0.08	0.08	0.07
TPI1	257.85	250.847	397.783	362.302	81.755	86.682	109.855	101.302	103.365	101.523	122.293	122.302			LIN28B	1.03	1.05	0.93	0.95	0.14	0.14	0.2	0.18	0.2	0.26	0.24	0.23
GAPDH	1583.86	1560.68	1964.65	1813.37	659.95	685.107	632.919	606.202	578.868	582.874	1096.37	1116.33			FOXM1	1.04	1.05	0.94	0.97	0.03	0.03	0.05	0.06	0.03	0.03	0.22	0.24
PGK1	142.315	136.411	176.562	158.496	73.78	75.914	69.756	61.143	63.992	61.917	93.285	90.046
PGAM1	27.99	31.577	38.859	34.514	15.79	15.811	13.031	12.74	15.836	15.126	18.875	18.301
ENO1	467.425	460.804	834.379	727.489	223.184	231.922	245.25	225.481	201.488	190.983	400.264	402.773
ENO2	67.652	72.442	54.556	55.561	136.965	139.364	85.714	81.476	137.642	142.83	135.007	133.353
PKM	390.378	381.803	548.757	507.752	134.646	137.079	142.654	132.883	136.824	129.348	257.575	257.89
LDHA	38.564	32.372	39.12	36.568	9.743	10.175	14.19	13.829	11.916	12.998	17.845	17.928
LDHB	561.487	542.869	627.347	584.156	339.857	350.732	351.122	324.601	319.218	324.934	316.996	311.314
TCA
CS	63.82	60.899	63.52	61.234	52.263	52.839	51.299	50.346	55.708	55.853	62.145	62.935
ACO2	44.204	42.911	41.219	34.939	53.763	53.103	45.421	41.86	53.734	48.692	86.42	86.322
IDH2	102.1	107.815	112.294	102.869	42.717	45.6	57.15	53.589	51.738	44.538	62.693	60.472
OGDH	20.527	20.03	20.085	18.332	14.724	15.79	13.861	13.197	15.421	13.141	20.369	20.137
SUCLA1	37.478	34.123	34.355	30.561	36.035	36.173	35.272	34.509	32.455	30.529	30.408	32.468
SUCLA2	20.165	17.715	19.131	17.617	16.031	17.33	15.122	14.593	19.923	21.628	26.923	27.65
SDHA	34.164	32.674	38.486	34.382	33.582	35.854	33.888	29.018	31.126	26.038	36.064	36.148
SDHB	31.314	31.36	28.907	27.588	30.012	30.271	22.65	20.934	21.115	18.98	26.519	25.375
SDHC	16.503	14.785	16.861	16.596	15.382	15.964	16.313	14.568	14.388	14.575	14.455	13.043
SDHD	20.805	19.408	20.285	19.122	20.931	22.125	18.428	17.428	14.296	15.392	13.619	13.057
FH	38.01	34.049	41.348	37.823	20.936	22.668	19.495	17.317	22.618	21.389	31.142	28.227
MDH2	94.146	93.064	108.391	94.113	78.732	82.703	72.488	67.606	78.298	63.647	95.447	94.579
PDC complex
PDK1	6.072	5.422	8.054	7.886	2.42	2.317	2.111	2.032	1.786	2.279	1.402	1.529
PDK2	11.762	11.083	14.651	13.206	14.025	15.136	17.642	17.052	18.345	17.054	13.155	12.839
PDK3	1.988	1.833	3.095	3.222	1.07	1.058	1.717	1.74	1.177	0.976	1.777	1.822
PDK4	1.179	1.325	2.154	2.341	0.945	1.155	0.894	0.845	0.693	0.684	0.184	0.169
PDP1	4.385	4.241	7.249	6.844	6.523	6.744	5.866	5.958	12.208	12.152	14.97	14.581
PDP2	2.424	2.558	2.111	2.135	5.394	5.48	3.419	3.103	3.45	3.78	3.587	3.615
PDHA1	18.681	18.036	20.179	18.559	17.889	19.245	17.806	17.269	14.722	15.764	19.058	18.787
PDHB	34.751	33.905	32.729	30.29	24.991	27.678	24.068	22.913	26.213	28.193	30.085	30.371
PDHX	11.476	10.181	11.016	11.219	11.097	12.552	11.939	11.651	14.499	14.204	14.996	15.409
DLAT	12.35	11.105	9.404	8.228	8.543	9.019	6.24	6.053	7.816	7.522	8.867	9.064
DLD	21.382	20.185	22.209	20.168	19.297	21.445	18.532	17.58	18.124	19.738	23.989	24.795
PPP
G6PD	24.239	23.645	30.615	25.936	23.57	24.21	13.993	12.942	12.174	9.947	41.597	41.578
H6PD	6.873	6.728	6.363	6.281	6.696	6.886	8.365	8.253	6.085	5.954	5.719	6.012
PGLS	33.312	37.648	36.473	34.796	31.71	34.146	28.79	30.018	35.911	22.622	41.665	42.369
PGD	154.423	151.202	170.339	158.626	95.557	103.418	101.428	94.146	106.112	103.513	145.185	149.685
RPE	14.598	14.077	15.694	14.122	12.639	12.566	12.698	14.033	12.156	13.635	11.86	12.281
RPIA	7.767	7.944	8.56	7.802	6.057	5.366	5.489	5.605	5.455	5.343	4.981	5.786
PRPS1	32.405	30.735	30.664	28.773	16.028	16.609	14.313	13.022	15.408	15.838	19.83	18.942
PRPS2	6.127	6.268	8.592	8.838	1.422	1.611	2.318	2.067	2.451	2.76	2.636	2.532
