# Supplementary material for: Metabolic reprogramming during neuronal differentiation from aerobic glycolysis to neuronal oxidative phosphorylation
Source: eLife journal article supplement (doi:10.7554/elife.13374), 2016-06-10
Supplement: supp [file elife-13374-supp-v1.zip › elife_poa_e13374_Figure_2_source_data_1.xlsx]

## Sheet: Fig2
Figure 2C	FPKM	NPC				Neuron 1 Week				Neuron 3 week
	HNRNPA1	144.954	137.854	198.773	184.337	58.639	60.056	74.907	73.332	67.355	71.022	72.614	70.624
	HNRNPA2	367.07	378.148	426.865	429.059	165.714	156.511	201.449	230.255	166.233	199.053	198.525	195.849
	HNRNP-I	93.253	93.934	120.053	109.263	35.486	38.32	52.855	46.225	33.839	25.384	49.78	50.084
		%
	HNRNPA1	87.32	83.04	119.74	111.05	35.32	36.18	45.12	44.18	40.58	42.78	43.74	42.54
	HNRNPA2	91.77	94.54	106.72	107.26	41.43	39.13	50.36	57.56	41.56	49.76	49.63	48.96
	HNRNP-I	89.67	90.32	115.44	105.06	34.12	36.85	50.82	44.45	32.54	24.41	47.87	48.16
