# Supplementary material for: Metabolic reprogramming during neuronal differentiation from aerobic glycolysis to neuronal oxidative phosphorylation
Source: eLife journal article supplement (doi:10.7554/elife.13374), 2016-06-10
Supplement: supp [file elife-13374-supp-v1.zip › elife_poa_e13374_Figure_3_figure_supplement_1_source_data_1.xlsx]

## Sheet: Fig3S1
		RT-PCR
		%		NPC			Neuron			Neuron E18
		HK2	72.7577	122.996	112.642	6.78671	8.89547	8.05744	4.87185	2.32169	4.59074
		LDHA	96.8654	98.8068	104.406	10.0794	10.6627	15.6621	3.67848	2.95773	4.54228
		HK1	97.7485	96.6072	104.62	62.8014	46.6717	51.9102	48.1149	43.6535	56.1759
		Figure 3—figure supplement 1. RTPCR analysis of mouse HK1, HK2 and LDHA in mouse NPCs derived from embryonic stem cell (ES-E14TG2a), 2-week differentiated neurons and embryonic neurons at E18. The relative mRNA expression levels of HK1, HK2 and LDHA in neurons were calculated against the levels in NPCs. Bars are mean ± SD, n=3.
