# Supplementary material for: Metabolic reprogramming during neuronal differentiation from aerobic glycolysis to neuronal oxidative phosphorylation
Source: eLife journal article supplement (doi:10.7554/elife.13374), 2016-06-10
Supplement: supp [file elife-13374-supp-v1.zip › elife_poa_e13374_Figure_3_figure_supplement_2_source_data_1.xlsx]

## Sheet: Fig3S2
		RT_PCR			uninduced			induced
		NPC	HK2	100.4	95.13	105.64	188.66	178.75	198.5
		Neuron	HK2	96.09	109.93	94.66	342.9	330.81	317.04
		Figure 3—figure supplement 2. Immunoblotting and real time PCR analysis of HK2 expression in neurons with inducible c-MYC. mRNA expression levels of HK2 relative to those from non-induction control were calculated after normalization to β-actin. Bars are mean ± SD, n=3.
