# Supplementary material for: Metabolic reprogramming during neuronal differentiation from aerobic glycolysis to neuronal oxidative phosphorylation
Source: eLife journal article supplement (doi:10.7554/elife.13374), 2016-06-10
Supplement: supp [file elife-13374-supp-v1.zip › elife_poa_e13374_Figure_3_source_data_1.xlsx]

## Sheet: Fig3
Figure 3C
		scramble control			HK2 shRNA1			HK2 shRNA 2
Fold increase of cell number	6.8	8.2	7.6	2.56	3.2	2.08	2.32	2	2.72
		Scramble control			LDHA shRNA 1			LDHA shRNA 2
Fold increase of cell number	6.4	8.4	7.4	2.24	1.92	1.76	2.68	2.24	2.12
Figure 3F			HK2			LDHA			N.C.
	IgG	0.01434	0.00982	0.0134	0.01158	0.0113	0.01352	0.01594	0.01495	0.01402
	c-MYC	0.06068	0.07853	0.07791	0.07496	0.08994	0.05706	0.01549	0.01424	0.01251
	N-Myc	0.11511	0.14193	0.1979	0.18477	0.19584	0.17371	0.01365	0.01282	0.01413
				uninduced			induced
	NPC	HK2	100.4	95.13	105.64	188.66	178.75	198.5
		LDHA	109.42	96.42	95.95	221.9	195.52	194.58
