# Supplementary material for: Metabolic reprogramming during neuronal differentiation from aerobic glycolysis to neuronal oxidative phosphorylation
Source: eLife journal article supplement (doi:10.7554/elife.13374), 2016-06-10
Supplement: supp [file elife-13374-supp-v1.zip › elife_poa_e13374_Figure_4_source_data_1.xlsx]

## Sheet: Fig 4
Figure 4C			MAP2			GFAP			GFAP mRNA abundance
	control	91	92	89	4	3	6		control	0.91	1.03	1.07
	HK2+LDHA	51	47	55	44	48	40		HK2+LDHA	7.72	9.19	8.83
Figure4J	lactate %		control			HK2+LDHA
		107.63	98.73	93.64	364.24	387.38	509.47
