# Supplementary material for: Metabolic reprogramming during neuronal differentiation from aerobic glycolysis to neuronal oxidative phosphorylation
Source: eLife journal article supplement (doi:10.7554/elife.13374), 2016-06-10
Supplement: supp [file elife-13374-supp-v1.zip › elife_poa_e13374_Figure_5_figure_supplement_1_source_data_1.xlsx]

## Sheet: Fig5S1
		FPKM
		NPC	27.8	28.58	30.1	27.3
		1Week	5.6	6	7.5	7.4
		3Week	4.7	4	6.1	7.8
		% UCP2
		NPC	0.976353	1.00204	1.0623	0.959733
		1Week	0.198243	0.207555	0.263985	0.260049
		3Week	0.164652	0.143956	0.216514	0.274982
		Figure 5—figure supplement 1. The fold changes of FPKM values of UCP2 are shown. Bars represent mean ± SD of four RNA-seq replicates for NPCs and neurons differentiated at 1 and 3 weeks.
