# Supplementary material for: Metabolic reprogramming during neuronal differentiation from aerobic glycolysis to neuronal oxidative phosphorylation
Source: eLife journal article supplement (doi:10.7554/elife.13374), 2016-06-10
Supplement: supp [file elife-13374-supp-v1.zip › elife_poa_e13374_Figure_5_source_data_1.xlsx]

## Sheet: Fig 5
Figure 5E	FPKM
Complex I	NPC				Neuron 1 week				Neuron 3 week
NDUFA1	72.695	73.999	68.532	64.878	64.954	72.168	72.223	67.876	67.557	68.609	57.82	54.899		Figure 5A	NPC	564	522	589
NDUFA2	40.921	37.848	50.159	42.889	30.966	33.1	36.903	29.266	32.185	28.567	29.401	31.09		mtDNA copy	1 week	982	1144	1087
NDUFA3	72.906	74.704	73.939	67.611	48.042	55.429	53.628	55.506	59.538	47.004	52.8	52.249			3 week	2251	2086	2154
NDUFA4	58.441	60.863	56.967	58.331	46.559	50.769	40.214	38.983	46.279	48.205	47.21	49.09			7 week	2033	1875	2368
NDUFA5	30.65	30.327	29.362	27.402	36.772	39.344	26.376	27.101	42.522	46.618	39.686	39.827
NDUFA6	59.59	56.443	59.73	53.267	27.415	29.677	28.003	26.029	32.775	30.566	35.444	36.907
NDUFA7	44.067	43.454	44.866	39.842	39.222	38.084	32.232	30.218	26.779	25.035	29.635	32.123		Figure 5B		NPC			Neuron 3week
NDUFA8	34.82	35.521	37.508	35.297	27.174	30.303	28.699	28.345	33.583	30.255	33.527	35.404		μg protein/million cells	50.78	55.27	46.23	184.42	235.38	227.54
NDUFA9	16.64	18.016	18.918	17.314	12.134	13.025	11.482	10.831	14.15	13.659	24.302	23.416
NDUFA10	13.127	13.387	14.275	13.307	14.286	14.385	16.188	16.28	18.066	18.504	16.835	17.007
NDUFA11	67.635	67.865	80.403	72.671	51.918	52.018	57.505	52.994	61.222	40.652	53.778	56.599
NDUFA12	56.303	53.341	52.916	47.461	38.996	40.677	37.929	35.296	41.834	42.896	48.448	47.81		Figure 5D	Fold increase	neuron 1 week				neuron 3 week
NDUFA13	186.938	195.741	231.846	202.433	141.796	145.915	171.543	156.715	148.973	126.206	146.799	143.144			PGC-1α	4.09	4.01	2.47	2.33	4.58	4.75	3.56	3.97
NDUFAB1	50.856	53.295	56.288	55.752	41.322	42.494	38.61	38.333	43.584	34.203	53.567	56.045			PGC-1β	0.92	0.79	0.33	0.17	0.78	0.43	1.08	0.87
NDUFAF1	9.608	8.712	10.783	9.94	9.336	9.741	7.852	8.712	9.044	9.978	11.016	10.882			ERRα	1.08	1.06	0.85	0.91	0.63	0.49	0.77	0.82
NDUFAF2	9.022	9.054	12.26	12.902	5.374	7.082	4.993	5.693	7.41	6.991	9.125	9.344			ERRβ	0.73	0.74	0.46	0.53	0.4	0.31	1.63	1.51
NDUFAF3	28.369	27.508	30.779	26.775	18.474	19.812	19.286	16.157	18.899	13.42	26.529	27.158			ERRγ	2.32	2.51	2.87	2.85	3.83	4.4	2.76	3.07
NDUFAF4	6.124	6.208	6.256	5.632	7.036	7.624	4.704	5.09	6.904	8.18	8.157	7.889			TFAM	0.56	0.63	0.49	0.45	0.56	0.63	0.68	0.65
NDUFAF5	4.983	4.839	4.578	4.254	4.967	4.552	3.766	3.317	6	6.662	7.435	7.628			POLRMT	0.92	1.07	0.95	0.96	0.82	0.5	1.14	1.15
NDUFAF6	4.249	3.912	3.244	3.473	4.332	3.542	3.407	2.986	4.122	4.122	4.067	4.2			NRF1	0.58	0.59	0.5	0.54	0.56	0.56	0.53	0.52
NDUFAF7	6.472	6.522	7.698	7.353	6.272	6.278	8.691	8.307	7.067	7.373	6.649	7.054
NDUFB1	50.259	52.849	58.137	60.763	22.042	27.632	34.759	33.133	40.871	46.499	48.009	46.601
NDUFB2	95.464	92.484	80.062	77.13	66.527	67.761	68.665	69.127	68.923	57.645	78.294	74.579		Figure 5F	%	Sramble control	ERRG KD	PGC1 KD		TCA	Sramble control	ERRG KD	PGC1 KD		Glycolysis	Sramble control	ERRG KD	PGC1 KD		OXPHOS	Sramble control	ERRG KD	PGC1 KD
NDUFB3	40.68	38.897	34.965	34.957	29.397	26.718	30.979	33.36	23.758	25.362	27.311	27.482			ERRG	109.87	14.01	95.99		CS	97.96	61.94	53.54		TPI	90.5	108.78	81.43		NDUFA1	101.59	58.35	62.79
NDUFB4	68.131	64.888	71.681	68.599	65.631	62.267	65.596	62.756	51.599	54.737	59.205	55.233				94.43	23.21	88.79			98.53	63.16	63.49			106.86	114.4	75.85			98.35	62.34	58.57
NDUFB5	49.204	47.844	55.671	51.54	39.271	42.824	40.434	37.756	36.011	35.57	39.931	38.893				95.9	15.43	80.63			103.5	59.54	56.31			103.25	108.01	77.04			99.95	62.76	60.64
NDUFB6	39.93	40.732	39.058	34.802	26.642	28.973	26.21	24.761	29.726	26.569	35.789	36.851
NDUFB7	54.735	60.761	58.826	49.377	39.53	41.196	40.73	35.64	45.447	22.398	47.179	48.169			PGC1	106.08	67.3	22.34		ACO2	109.18	127.09	42.16		GAPDH	95.51	107.3	100.44		NDUFB2	96.61	53.53	76.3
NDUFB8	90.239	87.11	99.271	101.506	57.196	61.348	50.334	53.906	60.215	62.23	78.392	77.678				97.55	65.93	25.07			90.11	119.26	55.75			104.19	105.62	87.53			96.18	56.07	80.36
NDUFB9	63.456	62.646	76.234	72.102	61.942	67.053	64.333	56.636	59.814	59.584	76.308	79.376				96.47	67.77	21.59			101.55	98.59	47.31			100.3	106.05	106.56			107.02	54.78	74.78
NDUFB10	55.907	53.934	61.646	61.597	46.575	50.749	43.712	45.07	50.774	42.784	55.096	57.347
NDUFB11	58.738	59.687	65.105	66.02	37.632	39.305	44.273	44.155	52.647	43.879	52.072	52.096			NRF1	98.68	61.95	51.31		IDH2	100.15	104.67	101.19		PGK1	99.48	90.64	97.87		UQCRC2	104.08	74.65	65.95
NDUFC1	34.326	30.155	34.831	30.376	18.342	20.497	21.099	17.888	26.262	18.937	26.736	30.714				98.08	65.65	62.63			100.57	96.19	104.57			107.99	96.69	97.37			103.49	78.74	54.04
NDUFC2	26.814	26.461	32.149	28.434	28.386	30.934	27.659	23.744	30.002	23.335	34.011	33.829				103.21	62.09	64.35			99.13	100.34	101.36			92.39	89.27	88.25			92.78	80.34	70.5
NDUFS1	29.276	27.02	24.517	24.175	25.596	25.011	19.982	19.115	18.372	20.177	25.178	24.605
NDUFS2	50.339	51.722	54.984	52.097	37.395	37.312	41.275	40.077	38.775	39.946	47.007	47.862			TFB1M	100.44	118.06	57.72		OGDH	103.92	151.42	47.12		PGAM	89.71	76.64	74.68		Cyc1	86.13	60.65	53.91
NDUFS3	63.173	64.538	67.389	58.249	40.037	41.813	39.171	35.214	46.346	38.99	57.949	59.647				99.12	128.96	51.5			108.29	147	50.86			109.22	83.14	82.7			99.47	64.53	50.57
NDUFS4	55.543	54.821	53.69	53.627	43.213	42.925	42.292	43.257	38.868	45.218	42.587	41.442				100.37	123.39	54.52			88.72	168.36	44.14			100.38	77.37	82.36			116.61	71.24	56.21
NDUFS5	134.667	139.644	143.871	140.769	87.448	89.421	93.153	84.431	86.146	101.232	110.296	108.297
NDUFS6	77.509	73.654	92.165	83.035	42.478	48.107	53.101	50.1	48.294	29.44	58.238	62.485			TFAM	113.79	97.97	55.22		SUCLA2	96.17	116.06	41.51		ENO1	96.37	81.24	54.45		CYCS	106.93	69.31	67.1
NDUFS7	38.947	40.606	47.516	37.114	38.152	40.514	30.617	30.123	41.296	11.518	42.611	40.915				85.19	101.47	46.54			120.07	99.31	42.91			103.64	81.79	62.68			94.31	87.26	83.36
NDUFS8	64.008	64.348	67.636	59.992	53.713	57.855	53.36	49.958	53.992	26.557	68.617	71.189				103.1	100.21	49.45			86.62	112.17	46.17			99.94	70.73	51.57			97.87	101.16	97.78
NDUFV1	47.697	48.551	45.975	43.538	48.57	48.862	41.147	41.081	51.755	41.495	53.374	52.812
NDUFV2	35.39	33.644	35.83	37.073	23.473	24.611	25.744	25.864	24.998	25.035	32.445	31.456								SDHA	101.09	80.18	72.7		PKM	96.65	110.9	68.33		COX5A	90.64	55.53	78.09
NDUFV3	18.806	16.906	20.23	20.404	13.966	13.749	12.88	13.454	14.383	12.237	18.256	16.946									99.57	91.58	57.1			103.43	87.53	60.54			109.02	45.18	81.62
																					99.23	85.69	60.83			99.99	98.53	56.19			99.41	49.73	90.22
Complex II
SDHA	34.164	32.674	38.486	34.382	33.582	35.854	33.888	29.018	31.126	26.038	36.064	36.148								SDHB	101.54	104.71	89.18							COX5B	98.98	42.98	77.66
SDHB	31.314	31.36	28.907	27.588	30.012	30.271	22.65	20.934	21.115	18.98	26.519	25.375									102.37	87.69	96.44								108.16	42.34	65.16
SDHC	16.503	14.785	16.861	16.596	15.382	15.964	16.313	14.568	14.388	14.575	14.455	13.043									97.06	98.91	95.71								93.24	42.66	66.03
SDHD	20.805	19.408	20.285	19.122	20.931	22.125	18.428	17.428	14.296	15.392	13.619	13.057
																				MDH1	98.79	92.49	92.79							ATP5A1	102.46	69.41	57.13
Complex III																					99.97	96.64	94.09								99.62	76.67	67.58
UQCR10	62.101	60.761	64.46	63.236	38.802	42.734	37.968	35.76	35.214	34.74	38.844	36.83									100.86	97.8	84.66								97.92	72.95	59.94
UQCR11	33.451	32.849	33.995	33.466	35.957	37.311	36.46	32.467	35.804	26.062	30.264	30.186
UQCRB	17.681	18.372	17.273	18.054	17.375	18.129	16.234	16.94	18.339	21.159	16.57	16.539																		ATP5B	103.26	60.17	60.13
UQCRC1	95.899	96.039	108.59	95.278	52.876	53.112	52.235	52.424	55.269	44.991	71.629	74.359																			96.77	59.82	50.33
UQCRC2	74.93	73.537	81.216	76.311	87.664	90.289	82.205	78.491	79.353	84.385	67.679	67.578																			99.96	59.99	68.06
UQCRFS1	42.947	40.902	46.471	43.443	31.262	31.945	28.383	26.073	34.136	31.441	39.234	39.734
UQCRH	97.928	104.955	115.005	111.383	86.808	83.824	78.985	80.147	93.768	99.382	75.414	72.736																		ATP5E	98.22	79.28	59.5
UQCRHL	51.386	50.223	51.835	51.055	40.429	42.322	31.661	35.189	36.146	37.268	28.799	28.279																			94.9	100.49	52.9
UQCRQ	38.325	39.556	36.817	32.134	25.594	26.239	29.245	27.906	28.128	24.023	32.919	32.679																			107.26	91.05	60.8
CYC1	57.062	57.152	67.4	60.952	36.948	38.658	37.724	33.944	36.257	32.153	53.249	54.491
CYCS	19.115	18.523	17.117	17.048	18.325	19.72	15.788	15.805	22.287	24.629	30.934	29.764
Complex IV
COX4I1	154.611	150.004	177.137	150.706	136.977	145.28	149.761	133.889	156.515	132.329	118.138	122.489
COX5A	67.063	67.455	75.492	77.449	53.114	53.838	44.901	46.06	52.161	47.557	56.765	56.694
COX5B	56.534	66.434	65.566	68.423	53.258	61.897	63.91	71.599	62.836	44.951	75.865	77.813
COX6A1	88.035	91.639	112.149	103.273	96.874	103.729	111.235	98.066	95.192	78.867	105.036	106.547
COX6B1	131.871	131.575	137.45	133.891	105.028	109.356	112.681	109.652	111.402	109.338	100.326	104.752
COX6C	53.571	58.579	53.888	57.77	52.493	56.691	49.393	51.208	51.478	58.264	55.555	57.074
COX7A2	88.575	92.787	50.929	49.839	91.06	93.423	49.607	48.738	61.164	67.474	51.23	48.629
COX7A2L	63.837	60.383	79.347	72.039	72.236	76.225	83.566	73.267	74.856	72.069	47.126	49.468
COX7B	116.097	114.358	122.296	130.856	82.713	86.415	86.915	93.107	84.378	82.764	89.091	90.788
COX7C	277.571	285.414	280.376	274.424	226.831	229.613	277.425	269.149	238.805	239.079	184.607	182.302
COX8A	182.613	202.089	223.405	211.725	108.508	121.947	106.837	106.509	104.009	66.691	165.945	162.115
Complex V
ATP5A1	224.021	218.499	259.392	232.555	185.196	190.182	206.877	192.552	217.763	209.776	235.244	230.603
ATP5B	287.435	283.986	315.048	292.422	203.751	210.244	204.382	199.235	225.733	210.134	293.048	293.667
ATP5C1	115.076	113.458	108.818	101.729	97.227	97.718	90.683	83.913	82.336	81.949	96.564	96.135
ATP5D	31.788	37.615	40.017	35.688	35.333	40.243	28.39	31.307	39.814	17.32	43.072	43.562
ATP5E	409.463	413.6	291.262	279.952	206.896	208.048	216.732	216.73	227.801	203.96	213.003	210.596
ATP5EP2	36.916	36.512	25.411	26.03	17.273	18.272	19.095	22.502	19.289	18.187	13.734	13.426
ATP5F1	41.846	39.966	50.096	45.782	34.348	35.298	36.991	34.357	37.256	36.835	42.224	44.104
ATP5G1	39.789	44.769	57.771	49.869	26.567	25.027	34.116	30.319	44.789	42.442	56.92	48.482
ATP5G2	228.733	224.215	283.886	253.962	128.003	133.812	134.901	129.797	99.462	96.034	87.474	84.988
ATP5G3	45.044	45.422	52.448	48.273	32.726	33.796	39.169	35.565	34.69	34.165	35.883	35.464
ATP5H	100.436	97.014	99.404	94.388	71.987	76.323	72.813	73.69	72.045	71.85	76.327	72.451
ATP5I	99.031	104.8	109.079	112.021	77.489	76.451	82.029	87.653	74.576	65.598	75.221	75.164
ATP5J	74.174	74.738	78.307	71.895	66.634	68.43	57.583	58.784	59.958	61.617	59.289	60.883
ATP5J2	121.388	126.039	131.52	129.465	64.368	68.606	75.565	65.315	75.73	82.882	85.442	81.726
ATP5L	71.172	70.419	78.274	73.868	56.439	56.462	61.568	58.698	54.324	56.09	44.651	44.696
ATP5O	155.47	157.49	180.733	170.735	103.967	107.549	128.975	119.906	120.928	122.782	129.176	127.348
