# Supplementary figures and images for: Metabolic reprogramming during neuronal differentiation from aerobic glycolysis to neuronal oxidative phosphorylation
Source: eLife journal article supplement (doi:10.7554/elife.13374), 2016-06-10

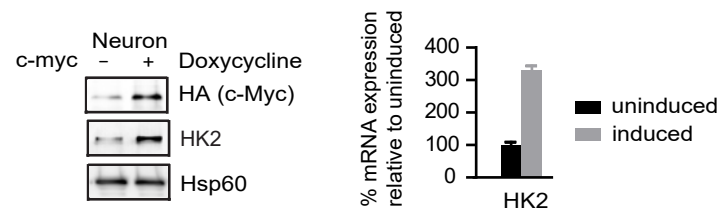

Figure 3, figure supplement 2

Supplement: supp [file elife-13374-supp-v1.zip]

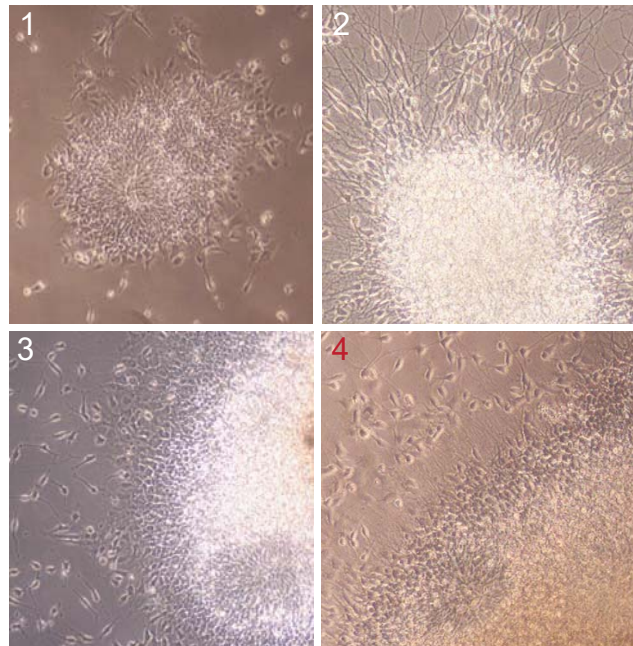

Figure 1, figure supplement 2

Supplement: supp [file elife-13374-supp-v1.zip]

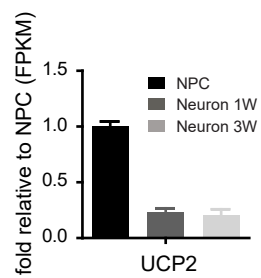

Figure 5, figure supplement 1

Supplement: supp [file elife-13374-supp-v1.zip]

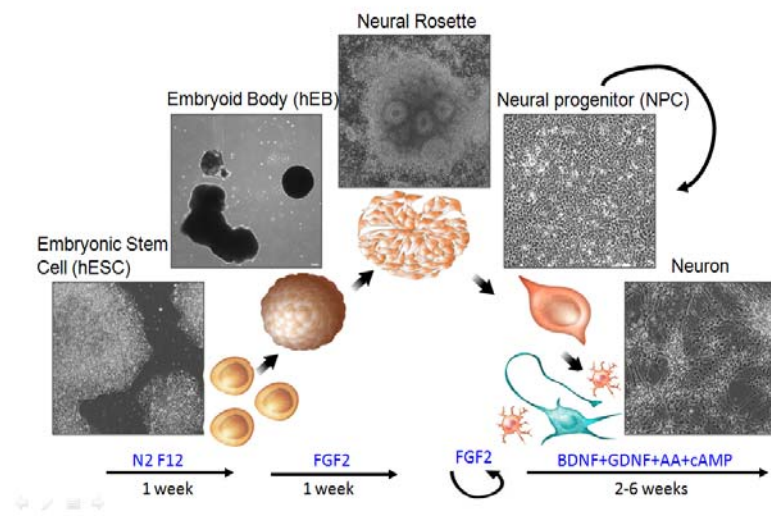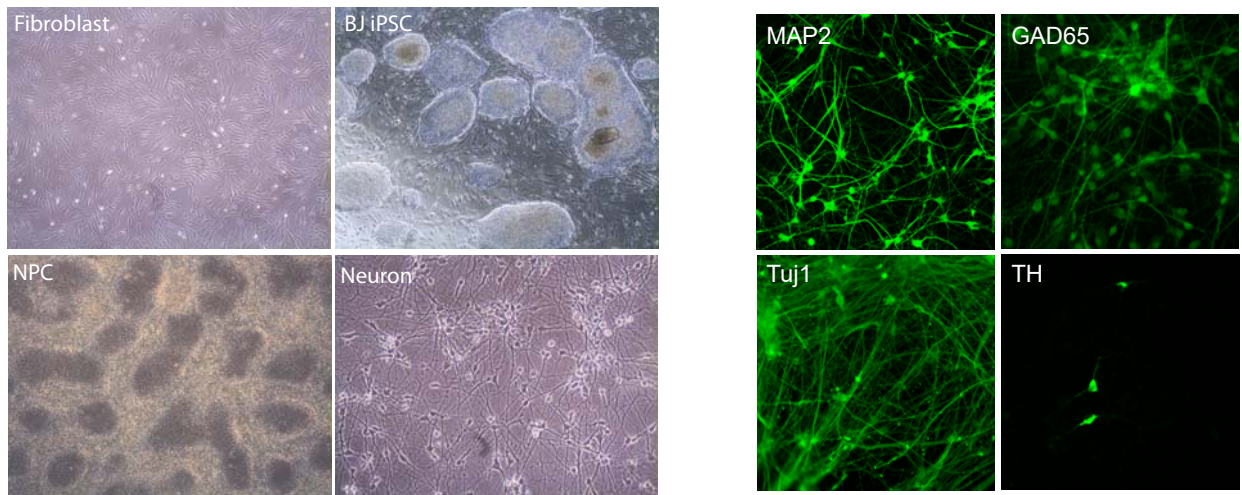

Figure 1, figure supplement 1

Supplement: supp [file elife-13374-supp-v1.zip]

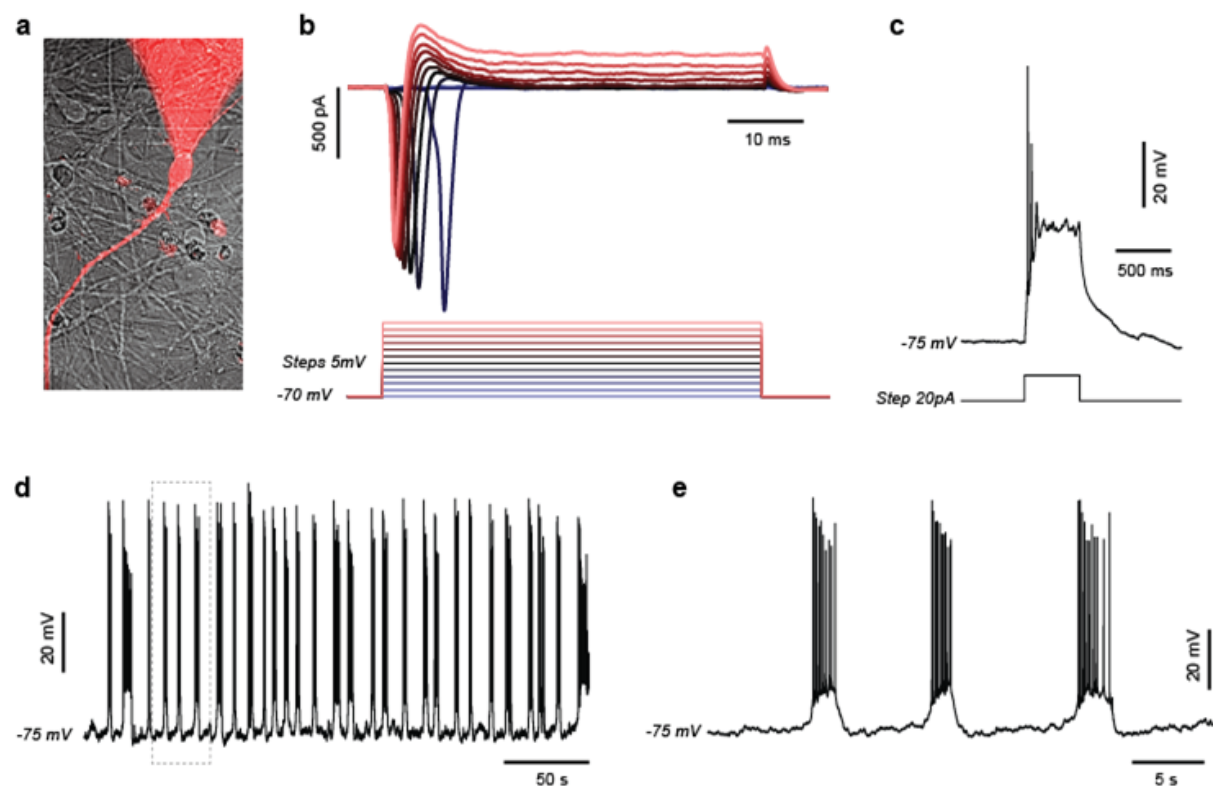

Figure 1, figure supplement 3

Supplement: supp [file elife-13374-supp-v1.zip]

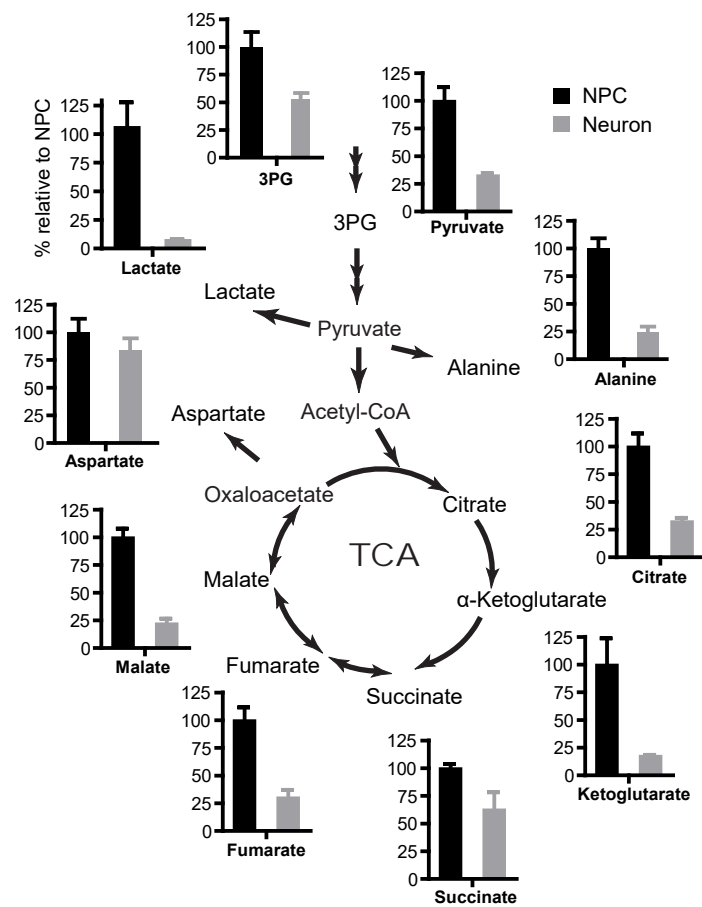

Figure 1, figure supplement 5

Supplement: supp [file elife-13374-supp-v1.zip]

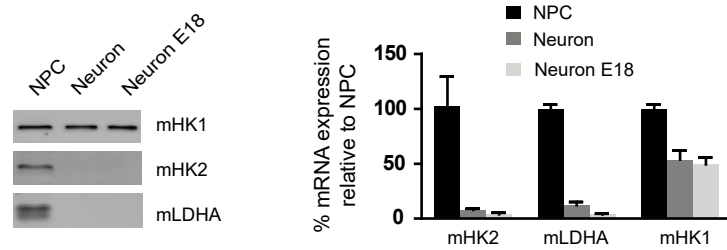

Figure 3, figure supplement 1

Supplement: supp [file elife-13374-supp-v1.zip › elife_poa_e13374_Figure_3_figure_supplement_1.pdf]

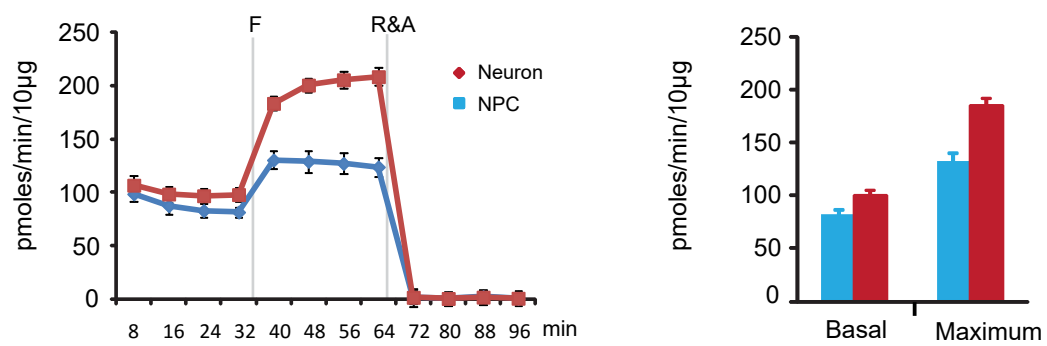

Figure 1, supplement 6

Supplement: supp [file elife-13374-supp-v1.zip › elife_poa_e13374_Figure_1_figure_supplement_6.pdf]

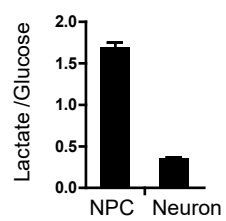

Figure 1, figure supplement 7

Supplement: supp [file elife-13374-supp-v1.zip › elife_poa_e13374_Figure_1_figure_supplement_7.pdf]
